# Supplementary material for: Peroxins in Peroxisomal Receptor Export System Contribute to Development, Stress Response, and Virulence of Insect Pathogenic Fungus Beauveria bassiana
Source: MDPI journal article supplement (doi:10.3390/jof8060622), 2022-06-10
Supplement: s1 [file s1]

**Table S1 Primers used in this study.**

| Primer name       | Sequence (5'-3')                                 | Purpose                             |
|-------------------|--------------------------------------------------|-------------------------------------|
| PEX1              |                                                  |                                     |
| P <sub>x</sub> 1  | GAGCTGTACAAGTAACCCGGGATAGGCTTTCTTGTGCTGG         | Amplifying 5'-fragment              |
| P <sub>x</sub> 2  | TGGCTGCAGGTCGACGGATCCGCCCCGTCCTTAGATGCTC         |                                     |
| P <sub>x</sub> 3  | GACCCATGGCTCGAGTCTAGAATCGCACATAACCATCAACAT       | Amplifying 3'-fragment              |
| P <sub>x</sub> 4  | GGTGGTGGTGGCTAGCGTTAACGTCAACAGAACGGAAGAAAG       |                                     |
| P <sub>x</sub> 5  | ATGATGGGCGGTTGTGAT                               | PCR for screening mutants           |
| P <sub>x</sub> 6  | GCTGCTGCTCTGAGTTTGC                              |                                     |
| P <sub>x</sub> 7  | ATCCGTCGACCTGCAGCCAAGCTTAACTGCTTGCCCTTCTTCT      | Cloning the entire ORF and promoter |
| P <sub>x</sub> 8  | ACACTAGTCAGATCTTCTAGTGTCCGAGTGACGGACTTTGA        |                                     |
| PL <sub>x</sub> 1 | ATTCAATCACAAACACCTTCAAAATGGCTCCTAGAAGGAATGCGCAAT | Cloning coding sequence             |
| PL <sub>x</sub> 2 | CTCCTCGCCCTTGCTCACCATCATGAGACTACTACGGCCTCCAATC   |                                     |
| AD-Pex1-F         | GCCATGGAGGCCAGTGAATTCATGGCTCCTAGAAGGAATGCG       | For Y2H test                        |
| AD-Pex1-R         | CAGCTCGAGCTCGATGGATCCCATGAGACTACTACGGCCTCCAAT    |                                     |
| PEX6              |                                                  |                                     |
| P <sub>x</sub> 1  | GAGCTGTACAAGTAACCCGGGTGCTTGTCGGAGATGTTG          | Amplifying 5'-fragment              |
| P <sub>x</sub> 2  | TGGCTGCAGGTCGACGGATCCTACTGCTGGGTGAAATGG          |                                     |
| P <sub>x</sub> 3  | AACGTCGACCCATGGCTCGAGCGAGACCGTCTTTGTGAG          | Amplifying 3'-fragment              |
| P <sub>x</sub> 4  | ACACTAGTCAGATCTTCTAGACGAGGTTGGCAAGGAGCA          |                                     |
| P <sub>x</sub> 5  | CTTGACAGTTCCACGCCTCT                             | PCR for screening mutants           |
| P <sub>x</sub> 6  | CGACTTGCTGAGTAGGGTGTTC                           |                                     |
| P <sub>x</sub> 7  | ATCCGTCGACCTGCAGCCAAGCTTCCGTGGAGCAGCAAGACT       | Cloning the entire ORF and promoter |

|                   |                                                   |                                     |
|-------------------|---------------------------------------------------|-------------------------------------|
| P <sub>x</sub> 8  | ACACTAGTCAGATCTTCTAGTGTGAGGAGGATGAGGAGAAGAAGA     |                                     |
| PL <sub>x</sub> 1 | ATTCAATCACAAACACCTTCAAAATGACGACAGCCTCGACCAGCGCGG  | Cloning coding sequence             |
| PL <sub>x</sub> 2 | CTCCTCGCCCTTGCTCACCATATACAAATCCTCATCATCACTCGCC    |                                     |
| BD-Pex6-F         | ATGGCCATGGAGGCCGAATTCATGACGACAGCCTCGACCAGCGCGG    | For Y2H test                        |
| BD-Pex6-R         | CGCTGCAGGTCGACGGATCCATACAAATCCTCATCATCACTCGCC     |                                     |
| AD-Pex6-F         | GCCATGGAGGCCAGTGAATTCATGACGACAGCCTCGACCAGCGCGG    | For Y2H test                        |
| AD-Pex6-R         | CAGCTCGAGCTCGATGGATCCATACAAATCCTCATCATCACTCGCC    |                                     |
| PEX26             |                                                   |                                     |
| P <sub>x</sub> 1  | GAGCTGTACAAGTAACGCATTCCAACGACTTTC                 | Amplifying 5'-fragment              |
| P <sub>x</sub> 2  | CGACGGATCCCCGGGCTGCGGGTTTGCTATTCTG                |                                     |
| P <sub>x</sub> 3  | GACCCATGGCTCGAGTCTAGACTTGGATTTTCGGAAACAGG         | Amplifying 3'-fragment              |
| P <sub>x</sub> 4  | GGTGGTGGTGGCTAGCGTTAACAAGGATCGTGACGGGTG           |                                     |
| P <sub>x</sub> 5  | CACATCACCGCTTGTCTGC                               | PCR for screening mutants           |
| P <sub>x</sub> 6  | CGTAGTCCCACTCATTGTTGC                             |                                     |
| P <sub>x</sub> 7  | ATCCGTCGACCTGCAGCCAAGCTTGGAATACCTGGACCCTAA        | Cloning the entire ORF and promoter |
| P <sub>x</sub> 8  | ACACTAGTCAGATCTTCTAGTGTCTAACCTGCCTCCCTCTAC        |                                     |
| PL <sub>x</sub> 1 | ATTCAATCACAAACACCTTCAAAATGTCCTTTGATGGCTCCTACGCTC  | Cloning coding sequence             |
| PL <sub>x</sub> 2 | CTCCTCGCCCTTGCTCACCATGATGTAGCTGACCTTGGTTCCCATG    |                                     |
| BD-Pex26-F        | ATGGCCATGGAGGCCGAATTCATGTCCTTTGATGGCTCCTACGCTCCGT | For Y2H test                        |
| BD-Pex26-R        | CGCTGCAGGTCGACGGATCCTTAGATGTAGCTGACCTTGGTTCCCATGC |                                     |
