# Supplementary material for: Peroxins in Peroxisomal Receptor Export System Contribute to Development, Stress Response, and Virulence of Insect Pathogenic Fungus Beauveria bassiana
Source: MDPI journal article supplement (doi:10.3390/jof8060622), 2022-06-10

**Figure S4 Ultra-structure for mycelia of *B. bassiana*.** Transmission electron microscopy was used to examine mycelial ultra-structures. There was no significance in peroxisome formation between the wild-type and each gene disruption mutant strain.

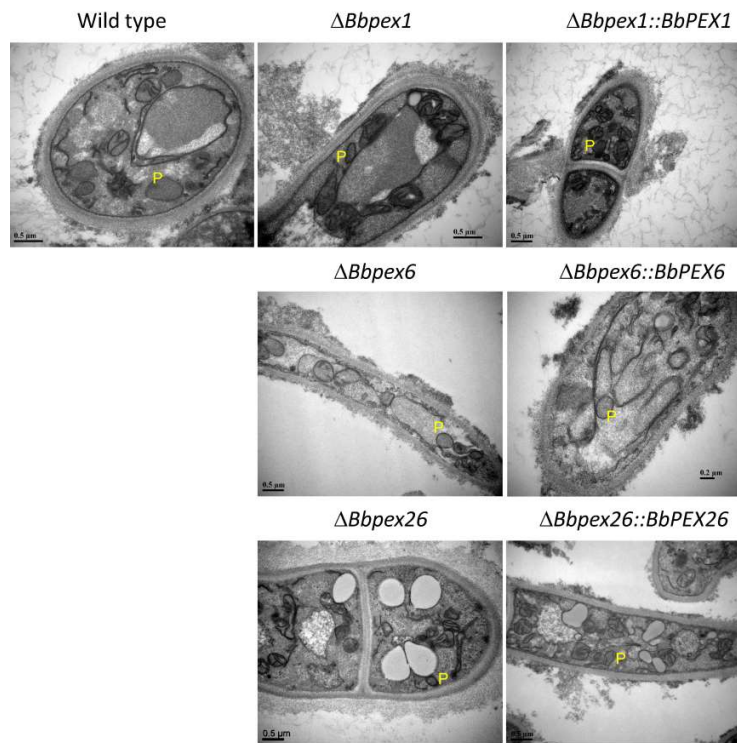

Supplement: s1 [file s1]
