# Supplementary material for: Peroxins in Peroxisomal Receptor Export System Contribute to Development, Stress Response, and Virulence of Insect Pathogenic Fungus Beauveria bassiana
Source: MDPI journal article supplement (doi:10.3390/jof8060622), 2022-06-10

**Figure S3 Construction of the gene disruption and complemented mutant strains.** (A) PCR screening for the gene disruption and complemented mutants. Lane 1: wild type, lane 2: disruption mutant, lane 3: complemented strain. DNA marker was used indicate the fragment size. (B) Representative images for homologous (HR) and non-homologous recombination (NHR) events. The fluorescent signals were detected under a laser scanning confocal microscope. The wild-type strain is used as negative control. Bars: 25  $\mu$ m.

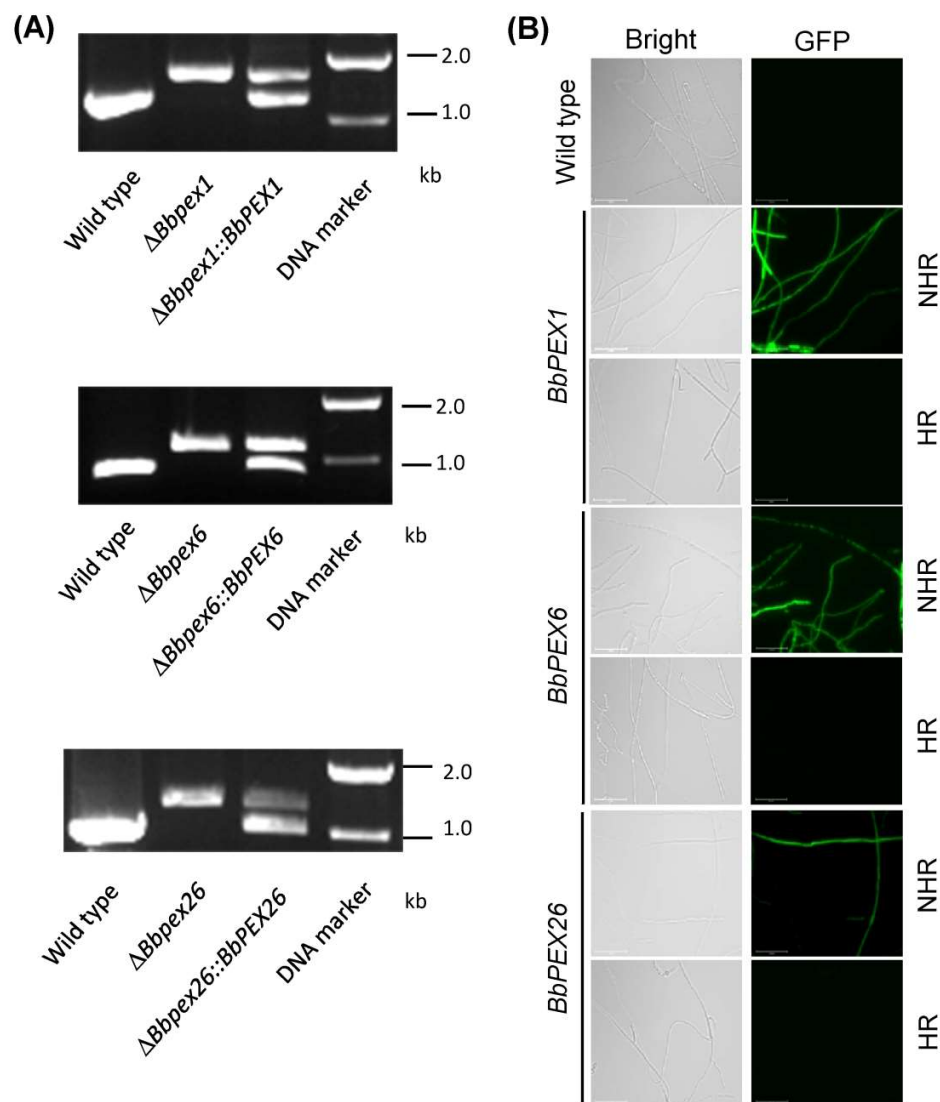

Supplement: s1 [file s1]
