# Supplementary material for: Peroxins in Peroxisomal Receptor Export System Contribute to Development, Stress Response, and Virulence of Insect Pathogenic Fungus Beauveria bassiana
Source: MDPI journal article supplement (doi:10.3390/jof8060622), 2022-06-10

**Figure S5 Pathogenic and saprotrophic growth of *B. bassiana*.** (A) Imaging for *in vivo* hyphal bodies and mycelia. Conidia suspension was injected into the host hemocoel, and the hosts were incubated for 3.5 d at 25°C. Fungal cells in hemolymph were sampled and examined under microscope. Scale bars: 20  $\mu$ m. HC: hemocyte, FC: fungal cell. (B) Mycoses on cadavers. Cadavers were incubated in a moist box for 4 d at 25°C. Scale bars: 1 cm.

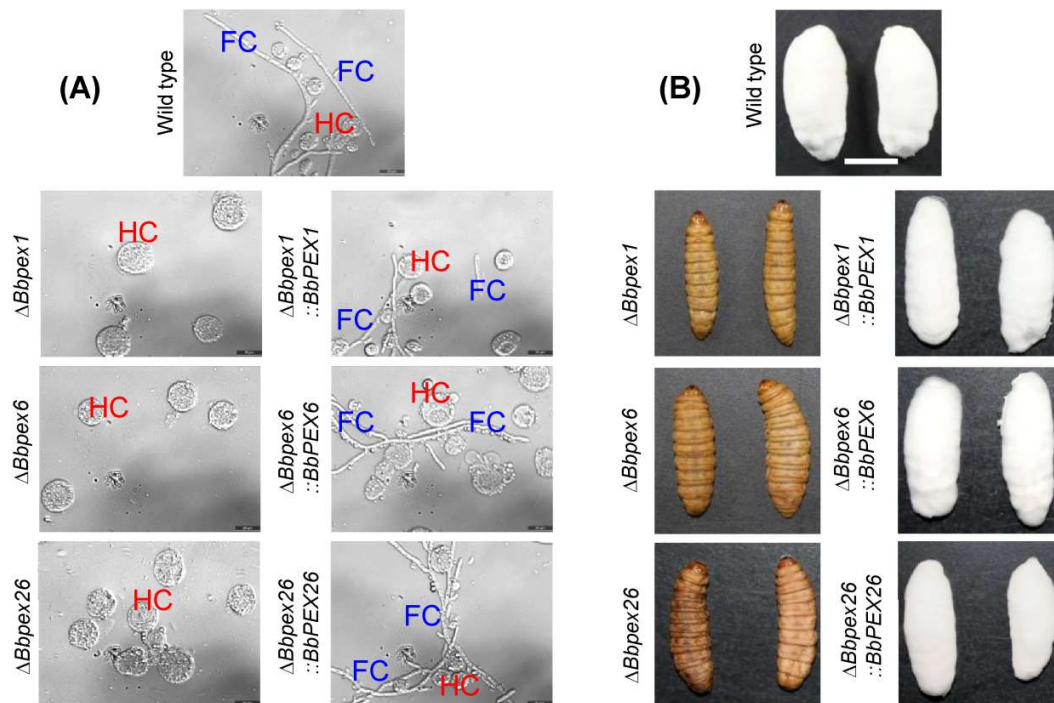

Supplement: s1 [file s1]
